# Supplementary material for: Electrogenerated chemiluminescence of luminol at a boron-doped diamond electrode for the detection of hypochlorite
Source: Royal Society of Chemistry journal article supplement (doi:10.1039/d2an00540a), 2022-01-01
Supplement: d2an00540a1.pdf [file d2an00540a1.pdf]

## Electrogenerated Chemiluminescence of Luminol at Boron-Doped Diamond

### Electrode for the Detection of Hypochlorite

Isnaini Rahmawati,<sup>a</sup> Endang Saepudin,<sup>a</sup> Andrea Fiorani,<sup>b</sup> Yasuaki Einaga,<sup>b</sup> Tribidasari A. Ivandini<sup>a</sup>

a. Department of Chemistry, Faculty of Mathematics and Sciences, Universitas Indonesia, Kampus UI Depok, Jakarta 16424, Indonesia

b. Department of Chemistry, Keio University, 3-14-1 Hiyoshi, 223-8522, Yokohama, Japan.

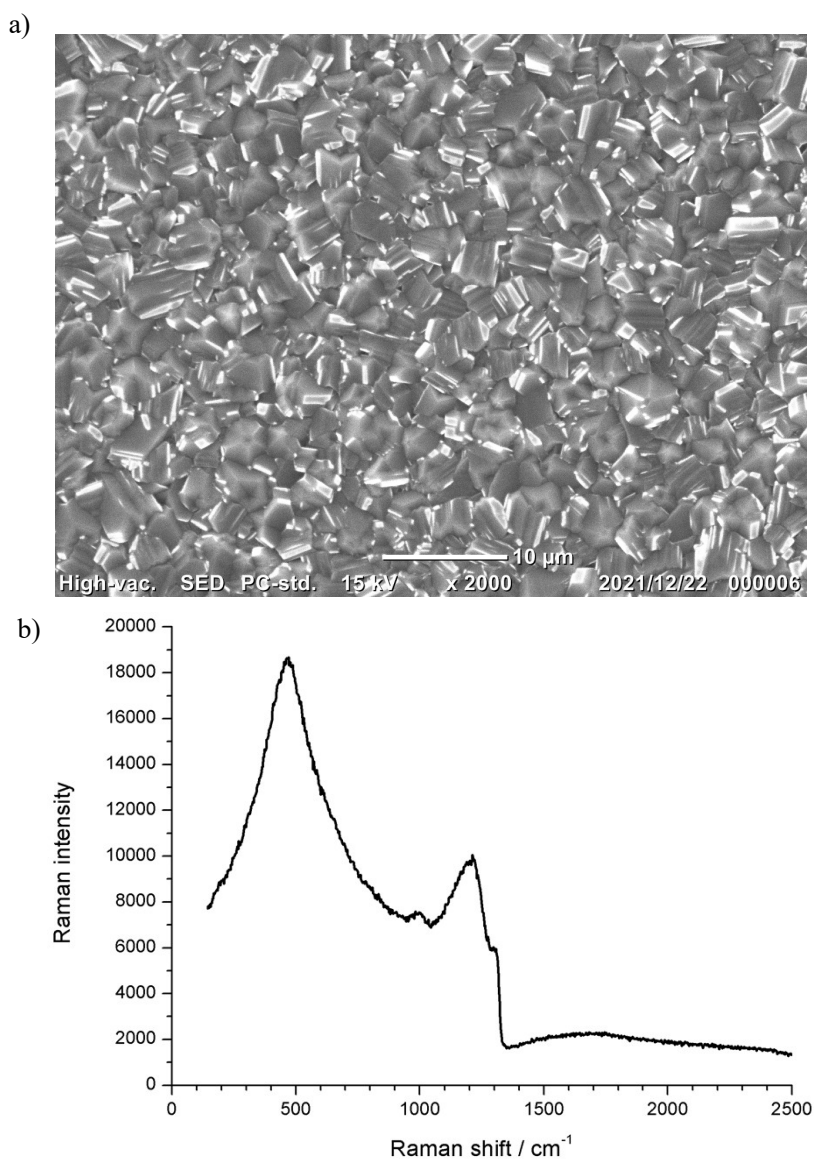

Figure S1. (a) SEM image, (b) Raman of BDD

a)

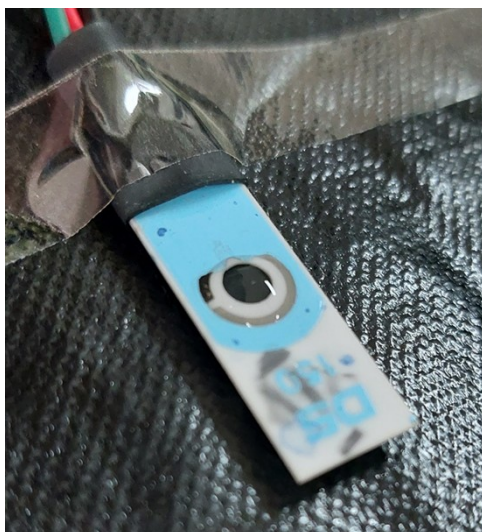

b)

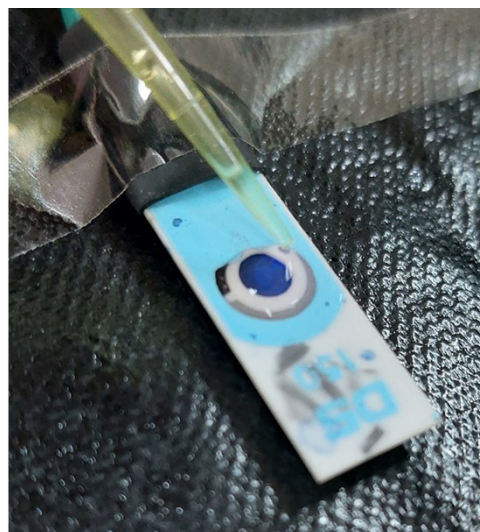

Figure S2. The surface of mini BDD a) before b) after the addition of NaClO 0,1 M in 10 mM luminol-H<sub>2</sub>O<sub>2</sub>

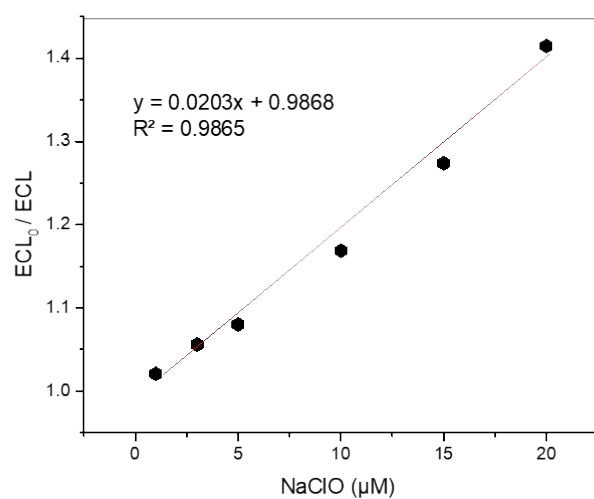

Figure S3. Stern Volmer Plot for ECL luminol-H<sub>2</sub>O<sub>2</sub> at BDD electrode with increasing concentrations of NaClO from 0 to 20 μM

Table S1. Measured pH for both pre and post spiked solutions.

| <i>Spiked NaClO /<math>\mu</math>M</i> | <i>pH pre</i> | <i>pH post</i> |
|----------------------------------------|---------------|----------------|
| 5                                      | 6.1           | 10             |
| 10                                     | 6.1           | 10.1           |
| 20                                     | 6.1           | 10.1           |
